# Supplementary material for: Cost and Scalability Analysis of Porcine Islet Isolation for Islet Transplantation: Comparison of Juvenile, Neonatal and Adult Pigs
Source: PubMed Central journal article supplement — Cell Transplant. 2019 Apr 30;28(7):967–72. doi: 10.1177/0963689719847460 (PMC6719497; doi:10.1177/0963689719847460), 2019-04-30
Supplement: Supplemental_Table_1.pdf [file Supplemental_Table_1.pdf]

**Supplemental Table 1.** Detailed costs of Neonatal, Juvenile, and Adult islet isolation

| Category                | Neonatal | Juvenile   | Adult       |
|-------------------------|----------|------------|-------------|
| Husbandry*              | \$96.01  | \$576.04   | \$9,958.78  |
| Surgical                | \$30.50  | \$30.50    | \$228.77    |
| Isolation               |          |            |             |
| Purification - supplies | \$0.00   | \$0.00     | \$3,255.61  |
| Purification - labor    | \$0.00   | \$0.00     | \$679.71    |
| Single use supplies     | \$410.51 | \$410.51   | \$9,911.55  |
| Staff                   | \$232.24 | \$232.24   | \$3,099.52  |
| Sum                     | \$769.26 | \$1,249.29 | \$27,133.94 |

\* Includes animal, shipping, and housing costs
